# Supplementary material for: Hybrid-Vlasov modelling of nightside auroral proton precipitation during southward interplanetary magnetic field conditions
Source: Copernicus journal article supplement (doi:10.5194/angeo-37-791-2019), 2019-09-10
Supplement: Supplementary file 1 [file angeo-37-791-2019-supplement.zip]

Archive with 4 entries (4 files):
- Supplementary_animation_S2.mp4
- Supplementary_animation_S1.mp4
- SupplementaryMaterial_angeo-2019-59.pdf
- angeo-37-791-2019-supplement-title-page.pdf
