# Supplementary material for: Hybrid-Vlasov modelling of nightside auroral proton precipitation during southward interplanetary magnetic field conditions
Source: Copernicus journal article supplement (doi:10.5194/angeo-37-791-2019), 2019-09-10
Supplement: Supplementary file 1 [file angeo-37-791-2019-supplement.zip › angeo-37-791-2019-supplement-title-page.pdf]

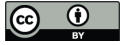

## *Supplement of*

# **Hybrid-Vlasov modelling of nightside auroral proton precipitation during southward interplanetary magnetic field conditions**

**Maxime Grandin et al.**

*Correspondence to:* Maxime Grandin ([maxime.grandin@helsinki.fi](mailto:maxime.grandin@helsinki.fi))

- [angeo-37-791-2019-supplement-title-page.pdf](#)
- [SupplementaryMaterial\\_angeo-2019-59.pdf](#)
- [Supplementary\\_animation\\_S1.mp4](#)
- [Supplementary\\_animation\\_S2.mp4](#)

The copyright of individual parts of the supplement might differ from the CC BY 4.0 License.
