# Supplementary material for: Hybrid-Vlasov modelling of nightside auroral proton precipitation during southward interplanetary magnetic field conditions
Source: Copernicus journal article supplement (doi:10.5194/angeo-37-791-2019), 2019-09-10
Supplement: Supplementary file 1 [file angeo-37-791-2019-supplement.zip › SupplementaryMaterial_angeo-2019-59.pdf]

# Supplementary Material to “Hybrid-Vlasov modelling of nightside auroral proton precipitation during southward interplanetary magnetic field conditions”

Maxime Grandin<sup>1</sup>, Markus Battarbee<sup>1</sup>, Adnane Osmane<sup>1</sup>, Urs Ganse<sup>1</sup>, Yann Pfau-Kempf<sup>1</sup>, Lucile Turc<sup>1</sup>, Thiago Brito<sup>1</sup>, Tuomas Koskela<sup>1</sup>, Maxime Dubart<sup>1</sup>, and Minna Palmroth<sup>1,2</sup>

<sup>1</sup>University of Helsinki, Department of Physics, Finland

<sup>2</sup>Finnish Meteorological Institute, Helsinki, Finland

**Correspondence:** M. Grandin (maxime.grandin@helsinki.fi)

## 1 Supplementary figures

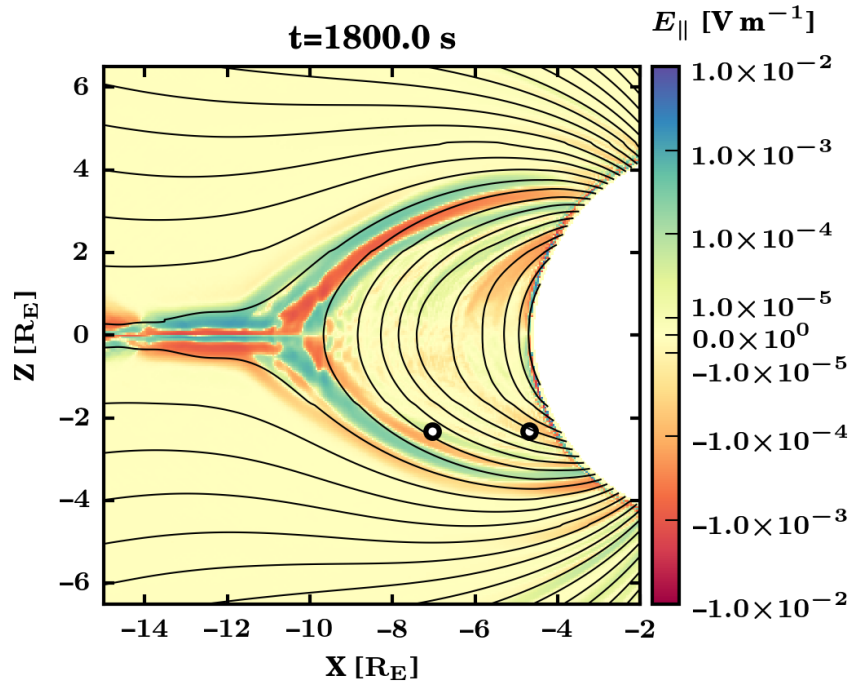

**Figure S1.** Simulated parallel component of the electric field in the nightside magnetosphere at  $t = 1800$  s and averaged over 120 s. The Sun is located beyond the right boundary of the figure. The two black circles filled with white are virtual spacecraft  $S_1$  and  $S_2$ .  $R_E = 6371$  km.

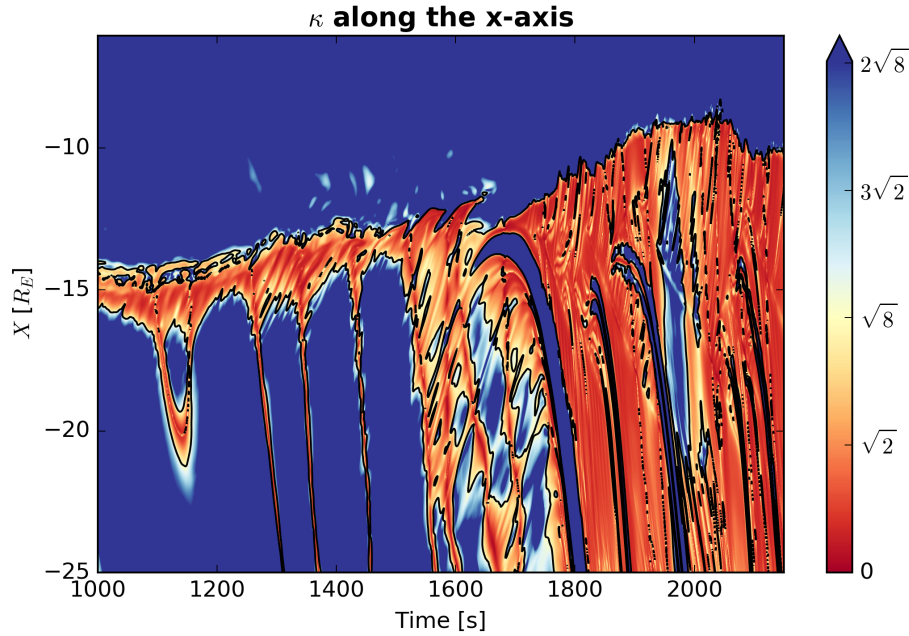

**Figure S2.**  $\kappa$  parameter along the  $x$ -axis between  $-25R_E$  and  $-6R_E$  as a function of time from  $t = 1000$  s until the end of the simulation. The black contour shows the critical value  $\sqrt{8}$  below which the criterion for particle pitch-angle scattering is verified (orange and red area). Note:  $\kappa = \sqrt{R_c/r_L}$ , with  $R_c$  the curvature radius of the magnetic field and  $r_L$  the proton gyroradius (Sergeev et al., 1983).

## 2 Supplementary animations

Supplementary animation S1 gives an overview of the dynamics of the nightside magnetosphere within  $-15R_E \leq X \leq -2R_E$  and  $|Z| \leq 6.5R_E$  from  $t = 1000$  s until the end of the simulation at  $t = 2150$  s. The background colour represents the simulated plasma temperature. The two black circles filled with white are virtual spacecraft  $S_1$  and  $S_2$  considered in the study, where  
5 velocity distribution function of protons are shown in the  $(v_{\parallel}, v_{B \times V})$  plane. The velocity grid spacing is  $1000 \text{ km s}^{-1}$ , and the magenta lines indicate the boundaries of the bounce loss cone.

Supplementary animation S2 shows the  $x$ -component of the plasma bulk velocity in the nightside part of the simulation plane from  $t = 1920$  s to  $t = 2080$  s. The red circle indicates the location of virtual spacecraft  $S_1$ , and the eight coloured plus signs show additional virtual spacecraft for which the parallel velocity components are shown in Fig. 7 of the paper. Black lines  
10 represent magnetic field lines.
